# Supplementary material
Source: PubMed Central journal article supplement (PMC10317538)

**$\alpha$ -FLAG**

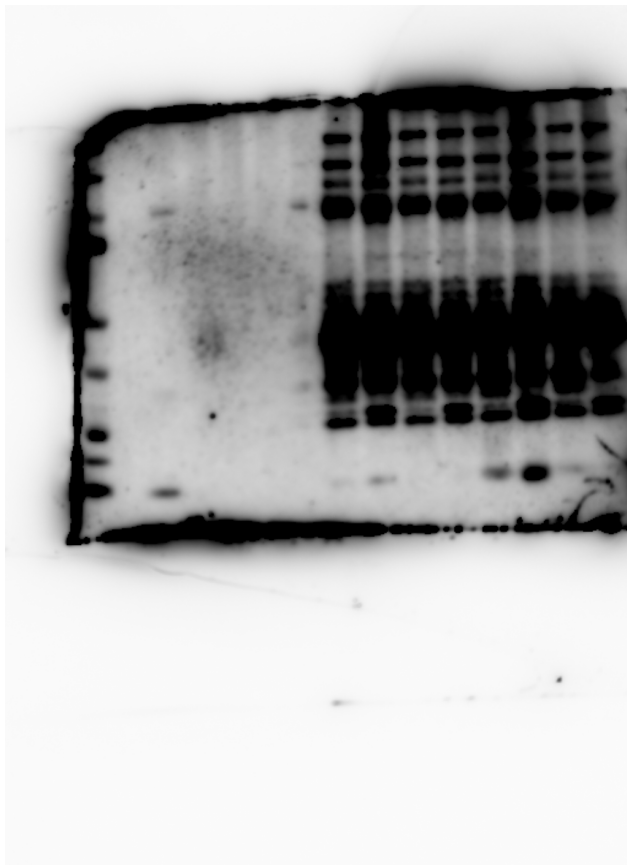

**Ponceau stain**

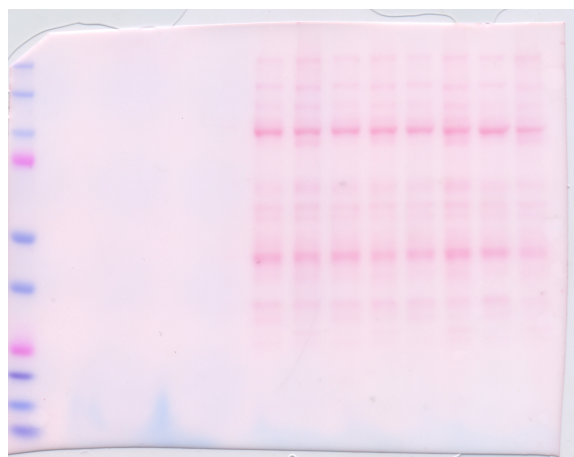

Supplement: NIHMS1724336-supplement-Unmodified_Gel_ED_Fig10.pdf [file NIHMS1724336-supplement-Unmodified_Gel_ED_Fig10.pdf]
